## Incremental value of cardiovascular magnetic resonance imaging in family screening for hypertrophic cardiomyopathy

Huurman R.<sup>1</sup>; Van Der Velde N.<sup>2</sup>; Hassing H.<sup>2</sup>; Budde R.<sup>2</sup>; Van Slegtenhorst M.<sup>3</sup>; Verhagen J.<sup>3</sup>; Schinkel A.<sup>1</sup>; Hirsch A.<sup>2</sup>; Michels M.<sup>1</sup>

<sup>1</sup>Erasmus University Medical Centre, Cardiology, Rotterdam, Netherlands (The)

<sup>2</sup>Erasmus University Medical Centre, Cardiology and Radiology, Rotterdam, Netherlands (The)

<sup>3</sup>Erasmus University Medical Centre, Clinical Genetics, Rotterdam, Netherlands (The)

**Funding Acknowledgements:** Type of funding sources: None.

Genetic testing in relatives of hypertrophic cardiomyopathy (HCM) patients can lead to early identification of carriers of pathogenic DNA variants (G+), before onset of left ventricular hypertrophy (LVH). Repeated evaluation by electrocardiography (ECG) and transthoracic echocardiography (TTE) is recommended to detect HCM during follow-up. Cardiovascular magnetic resonance (CMR) imaging has become valuable in the work-up of HCM, although its role in G+ subjects has not been extensively evaluated. In this study, we investigated the value of CMR in the G+/LVH- population.

We included 55 G+ subjects who underwent CMR in addition to ECG and TTE, with a maximal wall thickness (MWT) <15mm on TTE. The CMR imaging protocol consisted at least of steady state free precession imaging and 2-dimensional late gadolinium enhancement (LGE) images. ECGs were considered abnormal in case of pathologic Q waves, T wave inversion or signs of LVH (by voltage criteria including Sokolow-Lyon and a Romhilt-Estes score  $\geq 4$ ). TTEs were abnormal in case of LVH (defined as  $MWT \geq 10mm$ ). For both modalities, the diagnosis of HCM was based on a  $MWT \geq 13mm$ . The yield of CMR relative to ECG/TTE was assessed by comparing the proportion of HCM diagnoses and the presence of other phenotypic features. Forward step logistic regression was used to assess whether the presence of TTE/ECG abnormalities could predict reclassifications or abnormalities (crypts and LGE) on CMR.

An overview of ECG/TTE and CMR findings is shown in the Figure. Two of 16 (13%) subjects diagnosed with HCM on TTE were reclassified as having no HCM on CMR, and 8 of 39 (21%) subjects without HCM on TTE were reclassified as HCM on CMR. These 8 subjects had a mean MWT of  $15.4 \pm 2.6$  mm on CMR and a mean MWT difference of  $4.5 \pm 2.9$  mm (range 1.7-9.4) compared to TTE, which in 3 cases was explained by a hook-shaped thickening of the basal anterior wall in the 2 chamber view, not visible on TTE. Compared to subjects without HCM on both modalities, the reclassified group had a significantly higher QRS duration ( $104 \pm 14$  vs  $93 \pm 11$  ms,  $p = 0.03$ ) and anterior mitral valve leaflet length ( $30 \pm 4$  vs  $26 \pm 3$  mm,  $p = 0.01$ ). Of the 13 subjects with normal ECG/TTE results, none were reclassified as HCM using CMR.

The proportion of additional CMR abnormalities was large in subjects with and without abnormal ECG/TTE results (57% vs 38%,  $p = 0.24$ ). Subjects with poor TTE image quality were equally likely to be reclassified compared to those with sufficient image quality (10% vs 24%,  $p = 0.19$ ). Logistic regression demonstrated that the presence of TTE/ECG abnormalities (odds ratio [OR] 8.7 [1.3-59.0],  $p = 0.03$ ) and age (OR 1.1 [1.0-1.2],  $p < 0.01$ ) independently predicted reclassifications or presence of abnormalities using CMR.

Additional CMR imaging reclassifies 18% of subjects. Subjects with normal ECG and TTE results are not diagnosed as HCM on CMR, but the prevalence of HCM-related abnormalities on CMR was high in subjects with and without ECG/TTE abnormalities.

Abstract Figure. Diagnostic approach and CMR findings

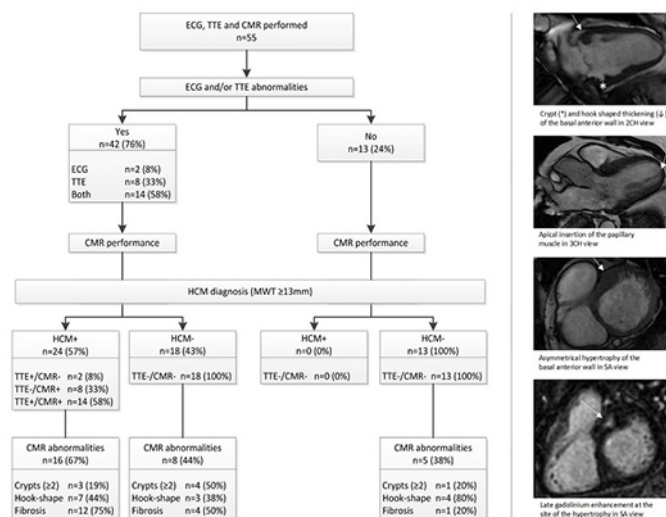

Source: http://academic.oup.com/ehjcimaging/article-pdf/22/Supplement_1/jeaa356.389/36214544/jeaa356.389.pdf
